# Supplementary material for: Detection of gene cis-regulatory element perturbations in single-cell transcriptomes
Source: PLOS journal article supplement (doi:10.1371/journal.pcbi.1008789), 2021-03-12
Supplement: S12 (10.1371/journal.pcbi.1008789.s012) [file journal.pcbi.1008789.s012]

|                                  |                 |                 | gRNA UMIs/cell (all) |      | gRNA UMIs/cell (assigned) |      |
|----------------------------------|-----------------|-----------------|----------------------|------|---------------------------|------|
|                                  | Number of cells | Number of reads | Median               | Max  | Median                    | Max  |
| CROP-seq_Jurkat_TCR_stimulated   | 3259            | 768,559,887     | 1                    | 38   | 1                         | 38   |
| CROP-seq_Jurkat_TCR_unstimulated | 2646            | 592,105,684     | 1                    | 65   | 1                         | 65   |
| PAC-seq (Purified)               | 9807            | 18,320,348      | 84                   | 3926 | 35                        | 2670 |
| PAC-seq (Bulk)                   | 8886            | 17,770,245      | 149                  | 8259 | 62                        | 4453 |
